# Supplementary material
Source: PubMed Central journal article supplement (PMC3819576)
Supplement: 97320630009883S1.pdf [file 97320630009883S1.pdf]

## Supplementary material:

**Table 1:** Summary of the sequence assemblies housed on BBGD454

| Sample                                                | Total number of reads assembled | Total number of reads in contigs | Number of contigs/singletons | Average contig/singleton length (nt) <sup>a</sup> |
|-------------------------------------------------------|---------------------------------|----------------------------------|------------------------------|---------------------------------------------------|
| Flower bud 0' (low temperature exposure) <sup>b</sup> | 69,943                          | 43,073                           | 2,675 / 26,870               | 804 / 323                                         |
| Flower bud 397'                                       | 74,169                          | 39,999                           | 2,751 / 34,170               | 760 / 306                                         |
| Flower bud 789'                                       | 69,874                          | 37,681                           | 2,645 / 32,193               | 785 / 319                                         |
| Flower bud 1333'                                      | 72,733                          | 41,836                           | 2,421 / 30,897               | 796 / 302                                         |
| <b>All flower bud samples</b>                         | <b>291,342</b>                  | <b>228,938</b>                   | <b>10,350 / 62,404</b>       | <b>898 / 280</b>                                  |
| Green fruit                                           | 73,168                          | 46,708                           | 2,241 / 26,460               | 720 / 284                                         |
| White fruit                                           | 69,260                          | 42,682                           | 2,029 / 26,578               | 700 / 298                                         |
| Pink fruit                                            | 68,767                          | 43,975                           | 1,964 / 24,792               | 750 / 297                                         |
| Blue/Ripe fruit                                       | 59,622                          | 37,615                           | 1,941 / 22,007               | 819 / 311                                         |
| <b>All berry samples</b>                              | <b>259,527</b>                  | <b>199,643</b>                   | <b>6,726 / 59,884</b>        | <b>818 / 267</b>                                  |
| Leaves and stems                                      | 62,465                          | 36,763                           | 1,781 / 25,702               | 771 / 298                                         |
| <b>All samples</b>                                    | <b>614,028</b>                  | <b>490,517</b>                   | <b>14,764 / 123,511</b>      | <b>933 / 253</b>                                  |
